# Supplementary material for: Synergism between the gradient dilution work function and the Janus electronic state of Pt-CoPxBr1−x for boosting alkaline seawater electrolysis
Source: Royal Society of Chemistry journal article supplement (doi:10.1039/d4gc05668j), 2025-01-01
Supplement: d4gc05668j1.pdf [file d4gc05668j1.pdf]

**Synergism between Gradient Dilution Work Function and Janus  
Electronic State of Pt-CoP<sub>x</sub>Br<sub>1-x</sub> for Boosting Alkaline Seawater  
electrolysis**

*Lei Jin, Hui Xu, Kun Wang, Yang Liu, Jie Chen, Xingyue Qian, Haiqun Chen\*,*

*Guangyu He\**

*Key Laboratory of Advanced Catalytic Materials and Technology, Advanced  
Catalysis and Green Manufacturing Collaborative Innovation Center, Changzhou  
University, Changzhou, Jiangsu Province 213164, China*

*Corresponding authors: xuhui006@cczu.edu.cn (H. Xu); chenhq@cczu.edu.cn (H.  
Chen); hegy@cczu.edu.cn (G. He)*

## 1. Material Characterizations

Crystalline structures were analyzed using powder X-ray diffraction (pXRD, D8, Bruker AXS) with Cu K $\alpha$  radiation ( $\lambda = 1.5418 \text{ \AA}$ ). The microstructures of the products were observed by transmission electron microscopy (TEM, JEM-2100F) and field-emission scanning electron microscopy (FESEM, Zeiss Supra 55) that equipped with element mappings. The morphologies of the materials were characterized by scanning electron microscopy (SEM, Zeiss Sigma 300 Cold Field scanning electron microscope). X-ray photoelectron spectroscopy (XPS, PHI-5000C ESCA, PerkinElmer, USA) was employed to obtain elemental information of prepared catalysts on a VG ESCALAB MKII using Al K $\alpha$  radiation. Ultraviolet photoelectron spectroscopy (UPS) is performed on Thermo ESCALAB Xi+ equipped with ultraviolet photoelectron spectrometer (HeI (21.22 eV)). Electron paramagnetic resonance (EPR) spectra were recorded on a Bruker EPR ELEXSYS 500 spectrometer. Absorbance data of spectrophotometer were measured on UV-2700 spectrophotometer. Analysis of the molecular structure of the catalyst was performed using a Raman spectrometer (XPOLORA PLUS, China) at an excitation wavelength of 532 nm for Raman scattering peak analysis.

## 2. Electrochemical Measurements

All the electrochemical measurements were tested using a CHI760E electrochemical workstation with a standard three electrode cell. The reference and counter electrodes were Hg/HgO and graphite rod, respectively. A glassy carbon electrode (GCE, 5 mm inner diameter, 0.196 cm<sup>2</sup> area) that modified with catalyst ink is used as the working electrode. The homogeneous catalyst ink was made by ultrasonically dispersing a mixture containing 2 mg of catalyst, 20  $\mu\text{L}$  Nafion (5 wt%), 360  $\mu\text{L}$  ethanol and 120  $\mu\text{L}$  H<sub>2</sub>O. Then, 13  $\mu\text{L}$  of the catalyst ink was dropped on the surface of GCE with an approximate mass loading of 265.0  $\mu\text{g}\cdot\text{cm}^{-2}$ . All potentials were measured against Hg/HgO and converted to reversible hydrogen electrode (RHE) by Nernst equation:  $E_{\text{vs RHE}} = E_{\text{vs Hg/HgO}} + 0.0591 \cdot \text{pH} + 0.098$ . The overpotential ( $\eta$ ) was calculated through the formula:  $\eta = E_{\text{RHE}} - 1.23 \text{ V}$ . Cyclic Voltammograms (CV) were measured at a scan rate of 5 mV $\cdot\text{s}^{-1}$ . Electrochemical impedance spectroscopy was

tested over the frequency range of  $10^6$  to  $10^{-2}$  Hz with an AC signal amplitude of 5 mV. The double-layer capacitance ( $C_{dl}$ ) was evaluated by cyclic voltammetry (CV) curves performed at the non-faraday reaction regions with an interval of  $20 \text{ mV}\cdot\text{s}^{-1}$  over the scanning range of  $20 \sim 120 \text{ mV}\cdot\text{s}^{-1}$ . The turnover frequency (TOF) values were calculated from the following equation:  $\text{TOF (s}^{-1}\text{)} = (j \times A) / (k \times F \times n)$ . Here,  $k$  is the number of electron transfer (the factors of HER is 2),  $j$  is the current density at a given overpotential,  $A$  is the geometric surface area of the electrode,  $F$  is the Faraday constant ( $96485.3 \text{ C mol}^{-1}$ ),  $n$  is the number of active sites (mol). The number of voltammetric charges is gained by CV curves from  $0 \sim 0.6 \text{ V vs. RHE}$  for HER in a phosphate buffer solution ( $\text{pH} = 7$ ) with a scan rate of  $50 \text{ mV s}^{-1}$  respectively, and the following equation is  $n \text{ (mol)} = Q/2F$  (the surface charge  $Q$  is proportional to the number of active sites). The long-term stability of the catalyst was conducted by chronopotentiometry (CP). All the data of electrochemistry were presented without any  $iR$  correction. In situ electrochemistry-Raman coupled experiments were conducted in a single-compartment, three-electrode, custom-made quartz cell controlled by an electrochemical workstation at room temperature. The loaded GCE, a graphite rod, and SCE were used as the working, counter, and reference electrodes, respectively. A stability potential in the range of  $-0.09468$  to  $-1.0268 \text{ V}$  with an interval of  $0.02 \text{ V}$  was applied to the catalyst electrode for 5 min before carrying out all in situ Raman spectra.

### 3. Finite Element Simulations

Free electron density and electric field around electrode were simulated using the COMSOL multiphysics finite-element-based solver. The “Electrostatics” module was used to simulate electric field when the electrode is under a specific potential bias. The electric field,  $E$ , was computed as the negative gradient of the electric potential as follows:

$$E = -\nabla V$$

The simulation model for Pt nanoparticles was a cone table with 2, 5, and 30 nm for top radii, bottom radii, and cone height, respectively. The electric potentials  $-1.5 \text{ V}$  was applied to the bottom of the needle. The ground was prescribed to the far side of

the electrolyte. Electric insulation was applied to the remaining electrolyte sides, and an initial value of 0 V was set everywhere.

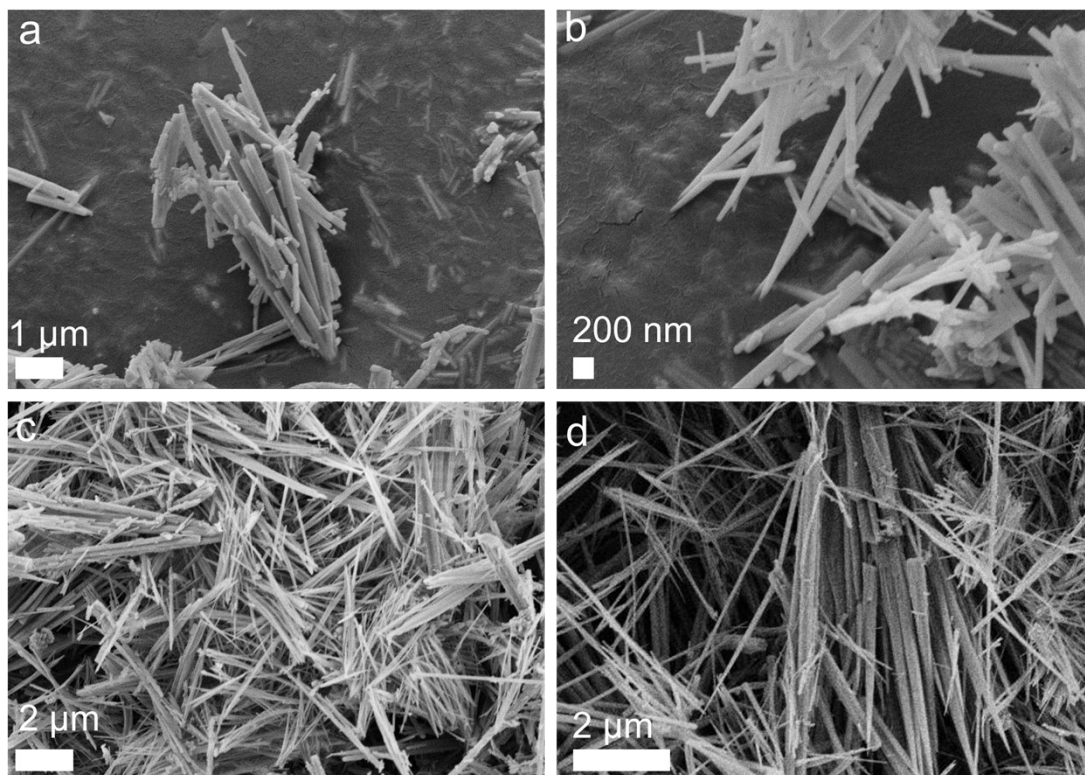

**Fig. S1** SEM image of the CoP,  $\text{CoP}_x\text{Br}_{1-x}$ , Pt-CoP and Pt- $\text{CoP}_x\text{Br}_{1-x}$ .

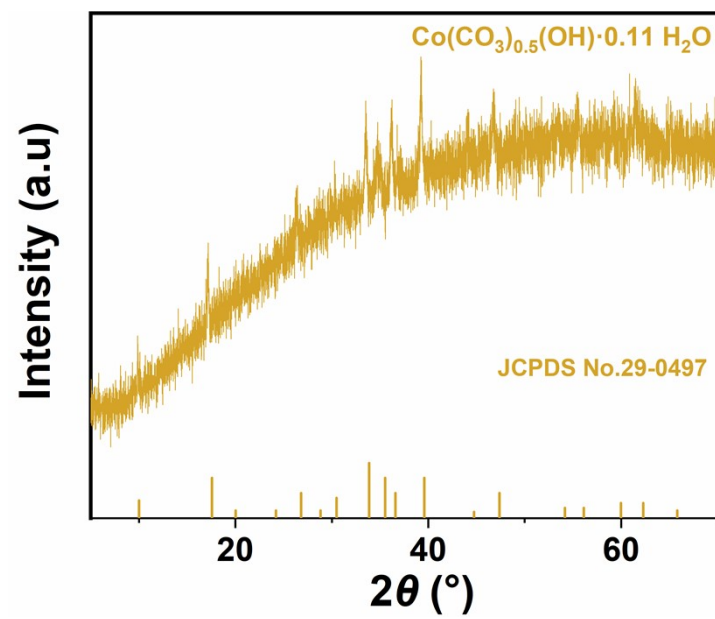

**Fig. S2** XRD pattern of the  $\text{Co}(\text{CO}_3)_{0.5}(\text{OH}) \cdot 0.11 \text{H}_2\text{O}$ .

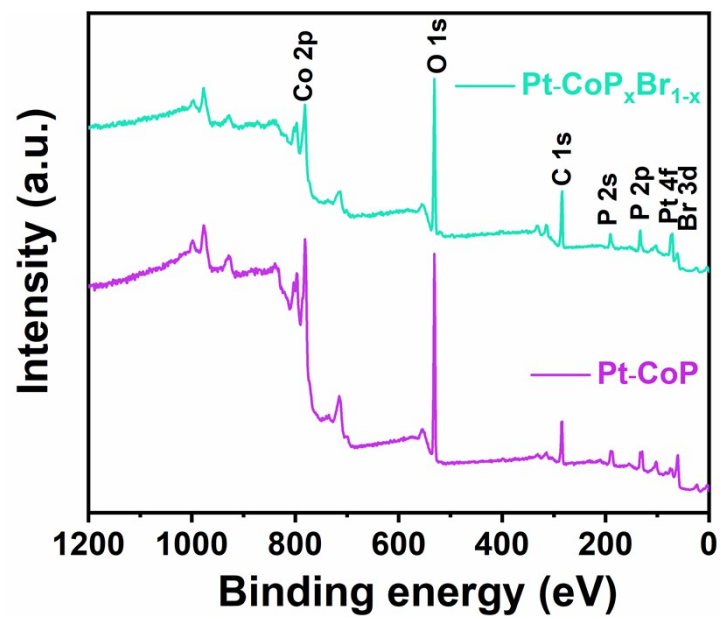

Fig. S3 XPS survey spectra of the Pt-CoP and Pt-CoP<sub>x</sub>Br<sub>1-x</sub>.

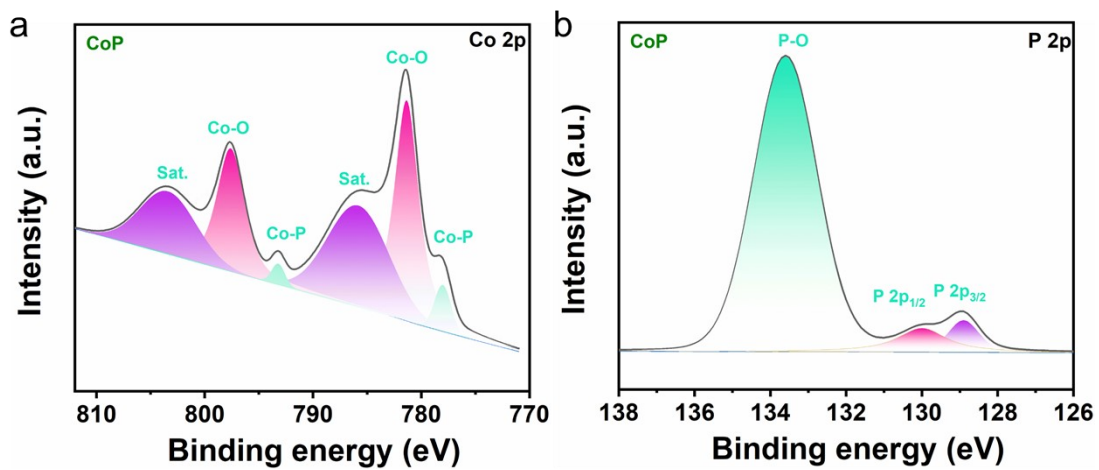

Fig. S4 High-resolution (a) Co 2p and (b) P 2p XPS spectra of CoP.



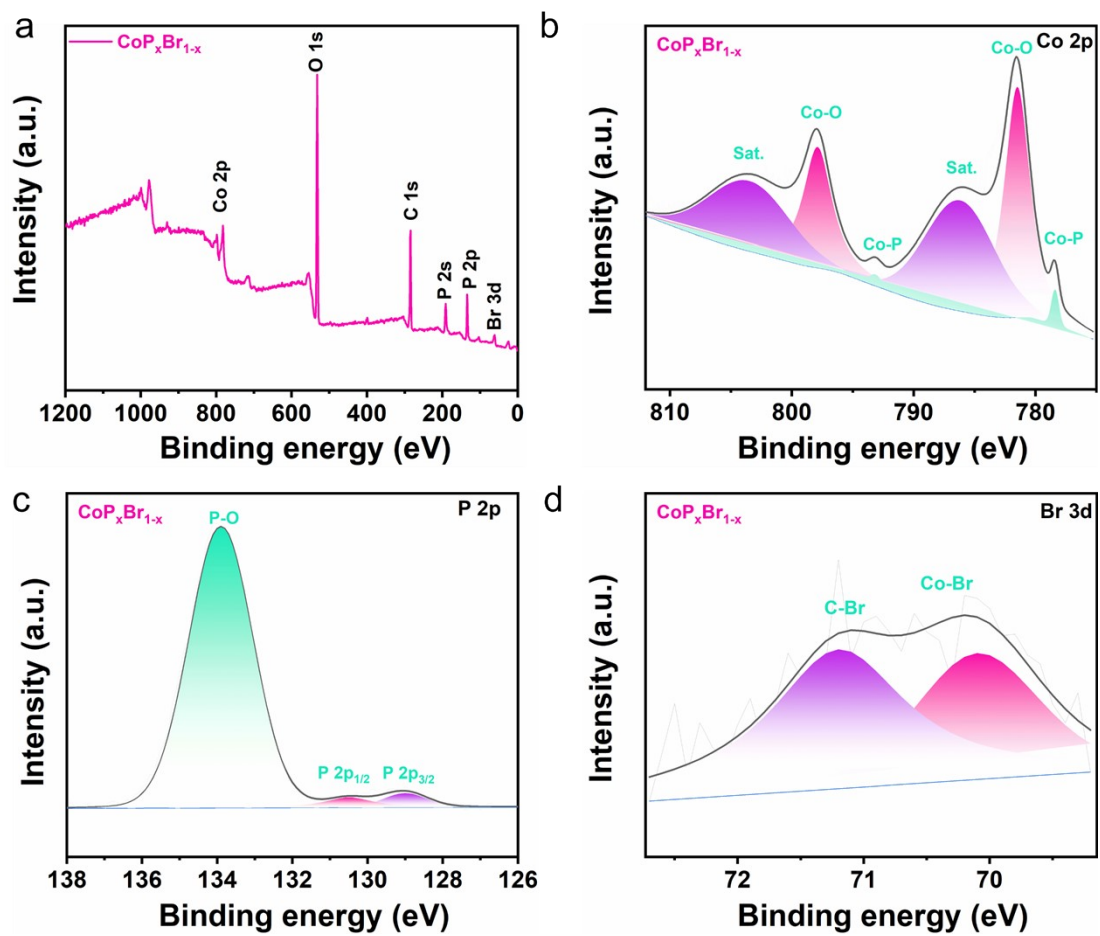

**Fig. S5** (a) XPS survey spectra, High-resolution (b)  $\text{Co } 2p$ , (c)  $\text{P } 2p$  (d)  $\text{Br } 3d$  XPS spectra of  $\text{CoP}_x\text{Br}_{1-x}$ .

**Table S1.** UPS measured work functions of as-prepared catalysts

| <b>Catalysts</b>                          | <b><math>E_{\text{cutoff}}</math> (eV)</b> | <b><math>E_{\text{VB}}</math> (eV)</b> | <b><math>\Phi</math> (eV)</b> |
|-------------------------------------------|--------------------------------------------|----------------------------------------|-------------------------------|
| <b>CoP</b>                                | 15.34                                      | 3.3                                    | 5.88                          |
| <b>CoP<sub>x</sub>Br<sub>1-x</sub></b>    | 15.48                                      | 3.46                                   | 5.74                          |
| <b>Vp-CoP<sub>x</sub>Br<sub>1-x</sub></b> | 15.61                                      | 3.41                                   | 5.61                          |
| <b>Pt</b>                                 | 15.79                                      | -----                                  | 5.43                          |

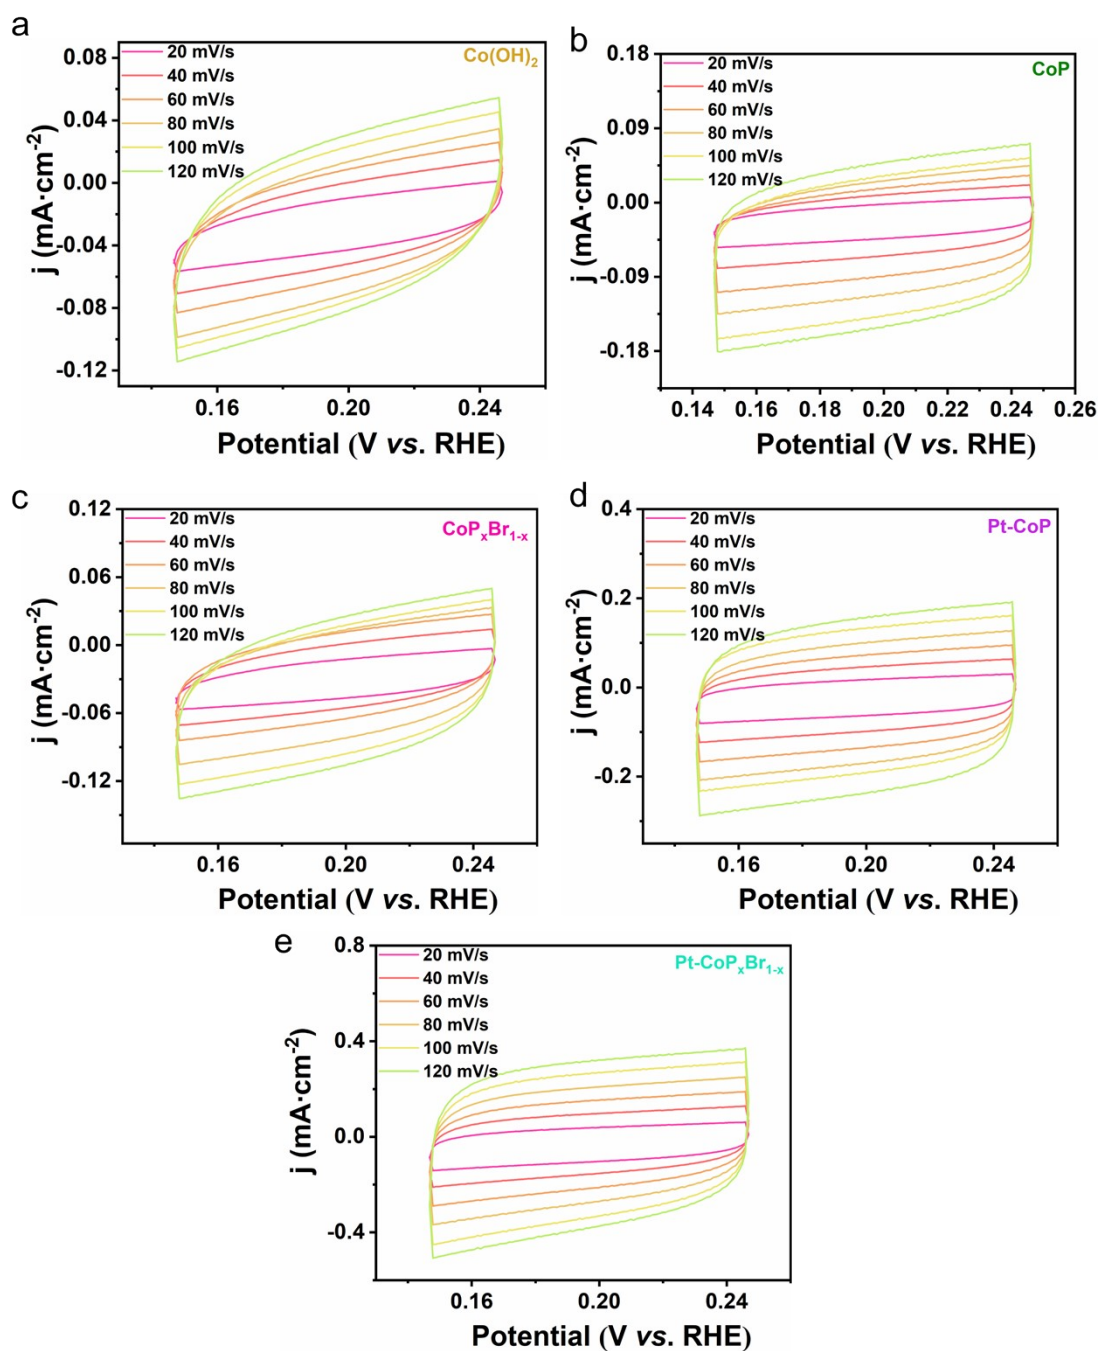

**Fig. S6** (a-e) CV curves of different electrocatalysts with different scanning rates for HER in alkaline seawater solution.

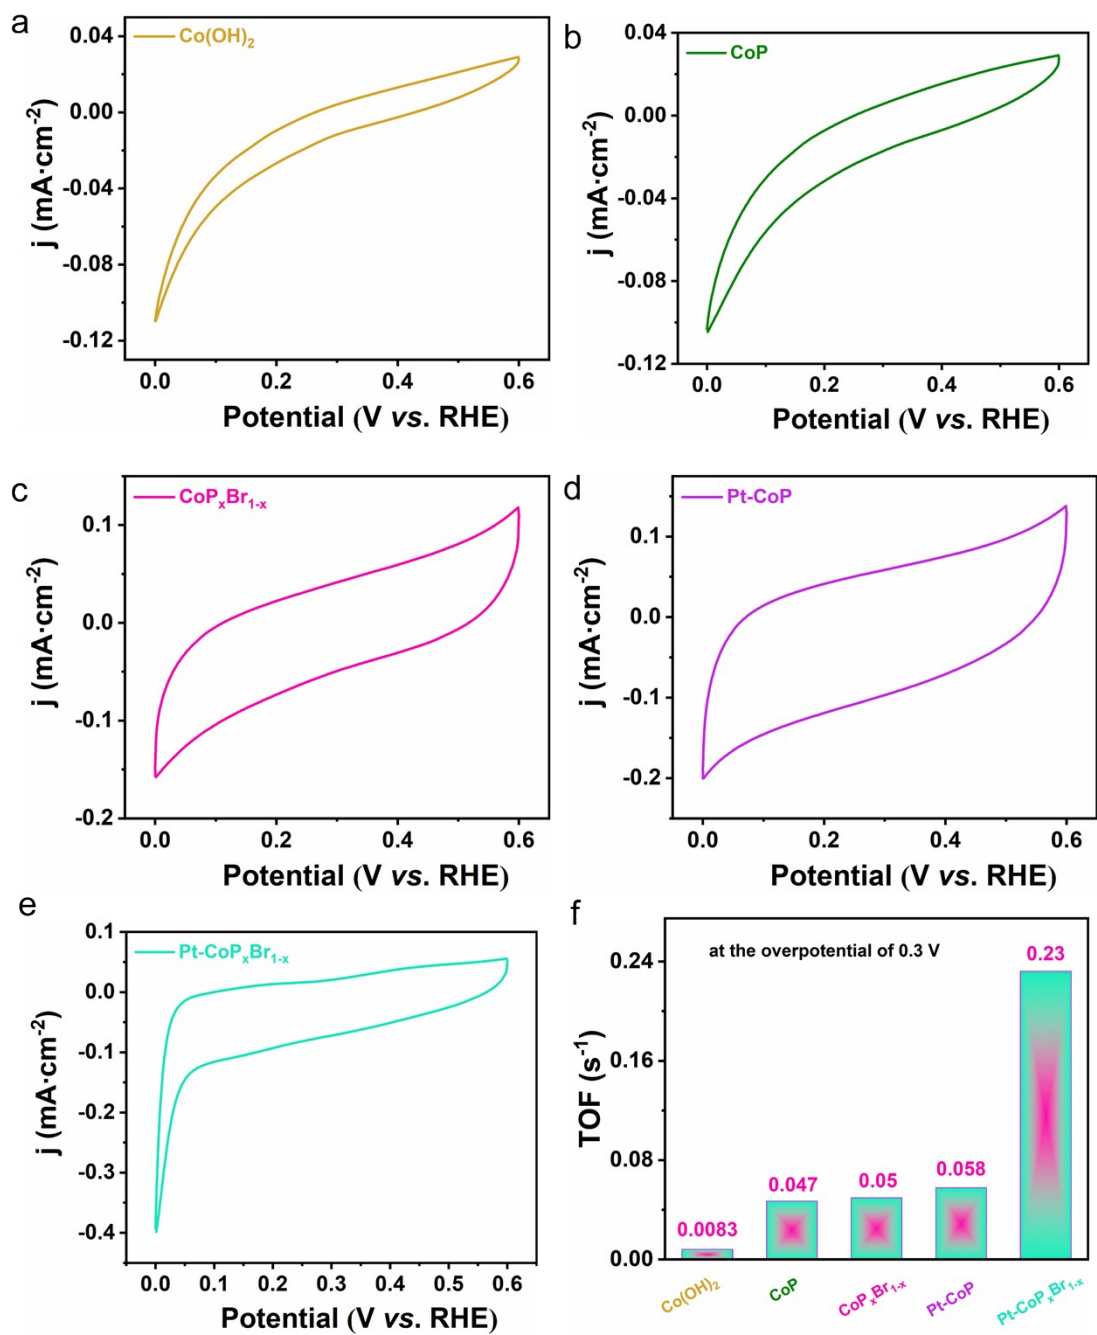

**Fig. S7** (a-e) CV curves from 0 to 0.6 V vs. RHE for HER in 1.0 M PBS (pH = 7) at 50  $\text{mV s}^{-1}$ . f) TOF values of different catalysts for HER in alkaline seawater solution.

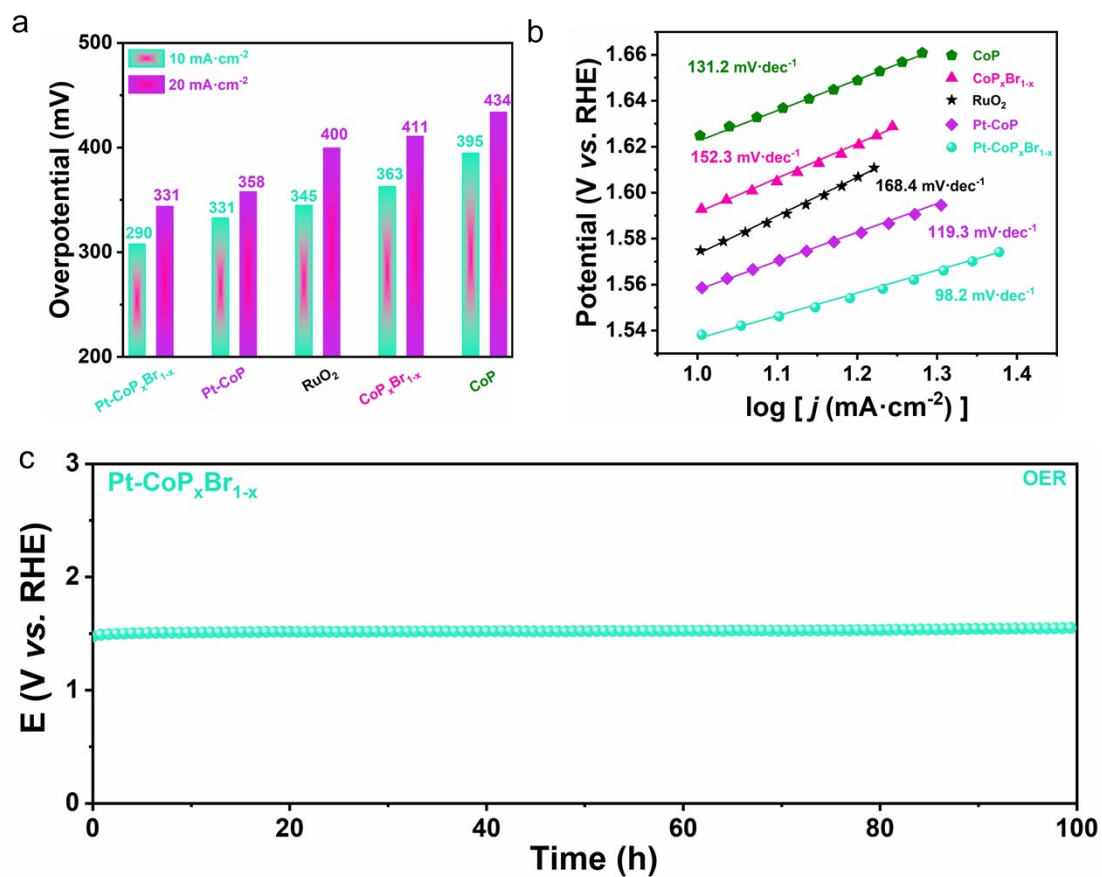

**Fig. S8** OER performance of Pt-CoP<sub>x</sub>Br<sub>1-x</sub> and referenced samples. (a) Histograms of the overpotentials at 10 mA cm<sup>-2</sup> and 20 mA cm<sup>-2</sup>. (b) Tafel plots. (c) CP test of Pt-CoP<sub>x</sub>Br<sub>1-x</sub> at a constant current density of 10 mA cm<sup>-2</sup>.

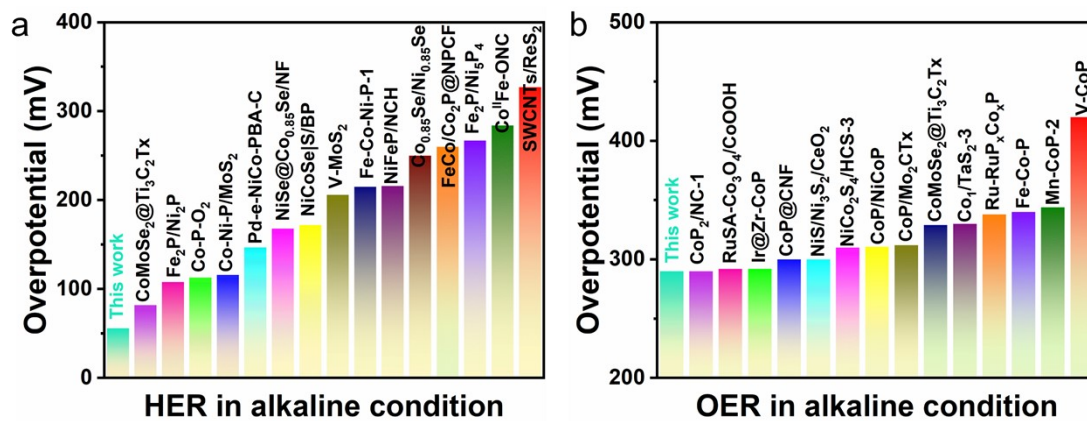

**Fig. S9 (a, b)** Comparison of Pt-CoP<sub>x</sub>Br<sub>1-x</sub> with reported HER and OER electrocatalysts in an alkaline condition at 10 mA·cm<sup>-2</sup>.

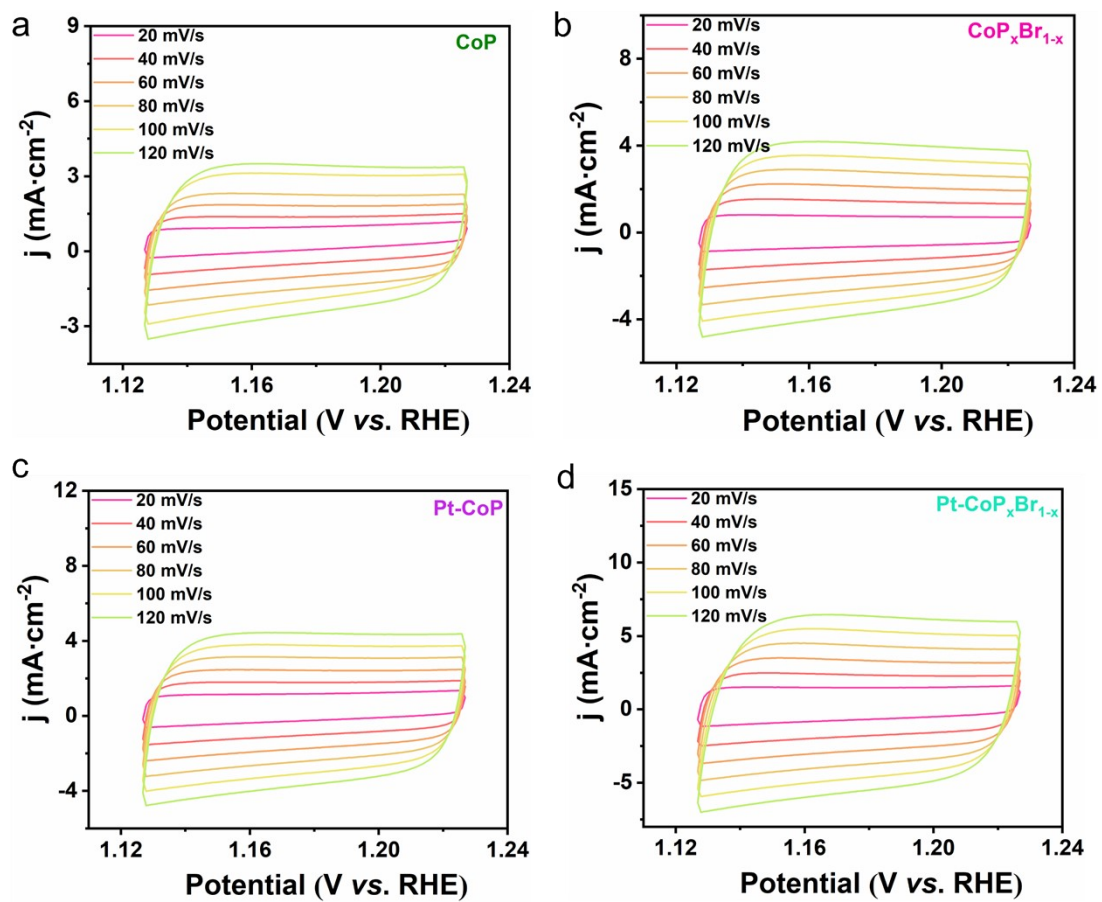

**Fig. S10** (a-d) CV curves of different electrocatalysts with different scanning rates for OER in alkaline seawater solution.

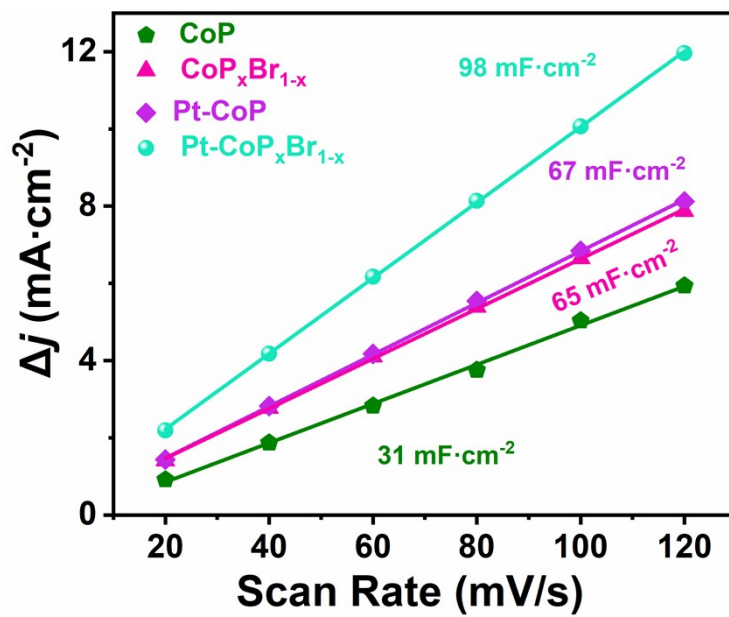

**Fig. S11**  $C_{dl}$  values of different catalysts for OER in alkaline seawater solution.



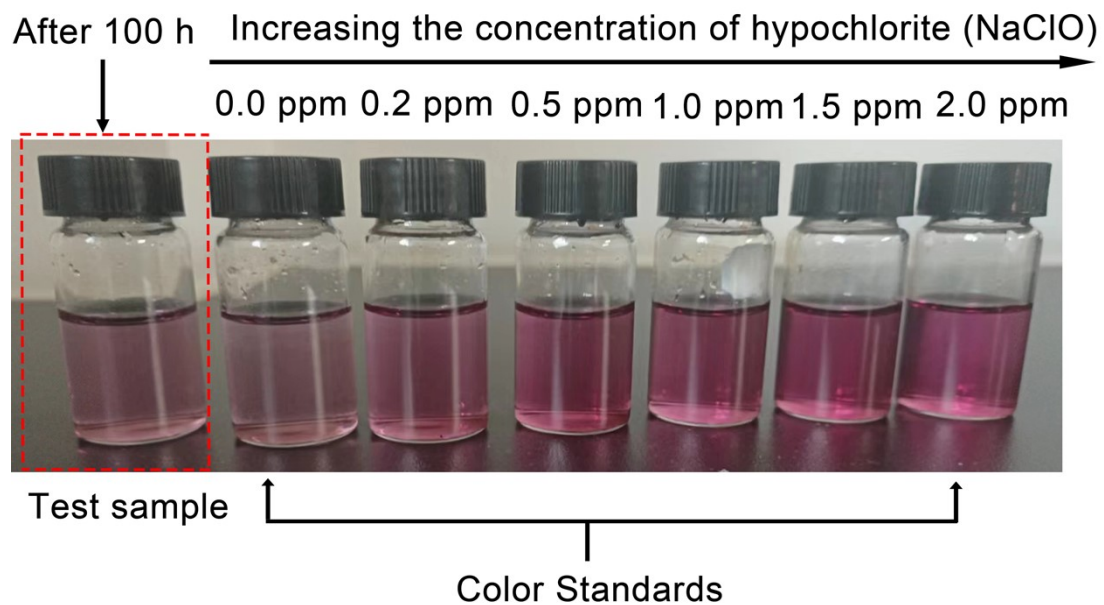

**Fig. S12** Hypochlorite detection result with different NaClO contents and the electrolyte after 100 h electrolysis for Pt-CoP<sub>x</sub>Br<sub>1-x</sub> at a constant current density of 10 mA cm<sup>-2</sup> in 1 M KOH + seawater.

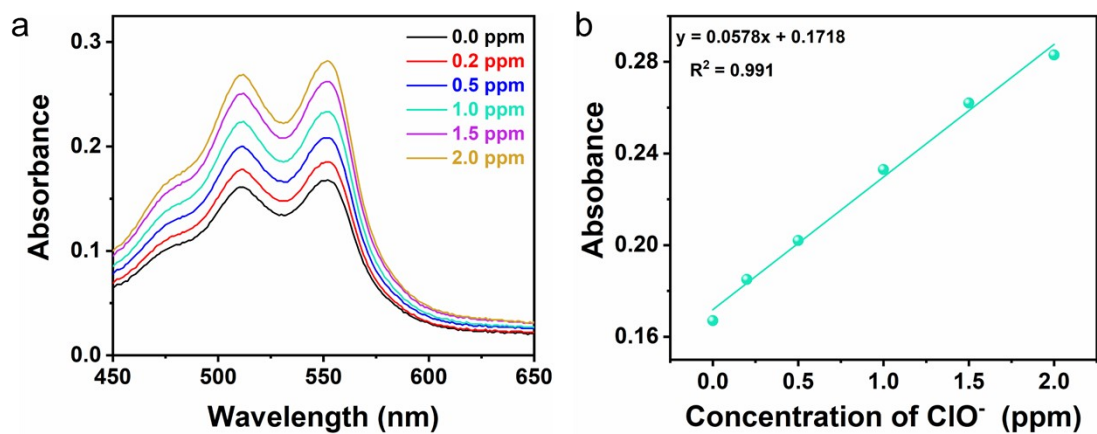

**Fig. S13** (a) UV-Vis absorption spectra of ClO<sup>-</sup> with different concentrations. (b) Calibration curve used for calculating ClO<sup>-</sup> concentrations of the electrolyte.

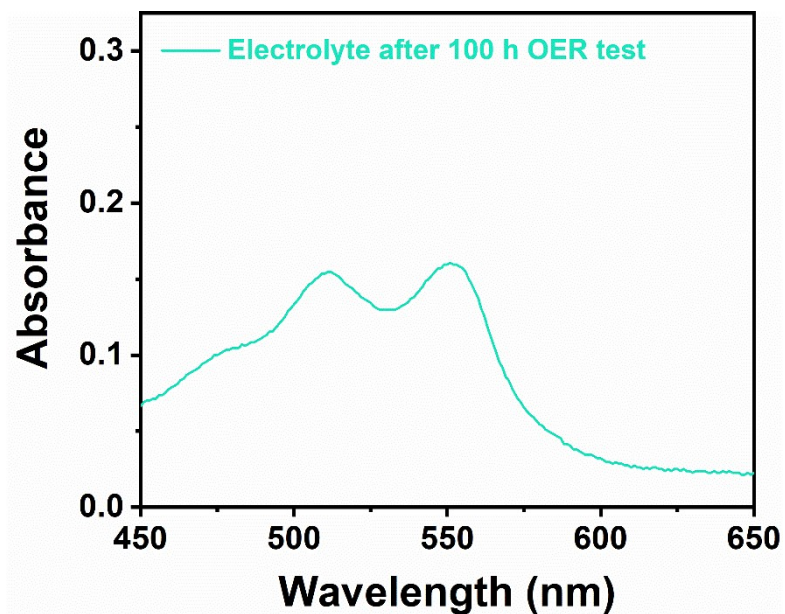

**Fig. S14** UV/Vis absorption spectrum of the electrolyte after 100 h electrolysis for Pt-CoP<sub>x</sub>Br<sub>1-x</sub> at a constant current density of 10 mA cm<sup>-2</sup> in 1 M KOH + seawater.

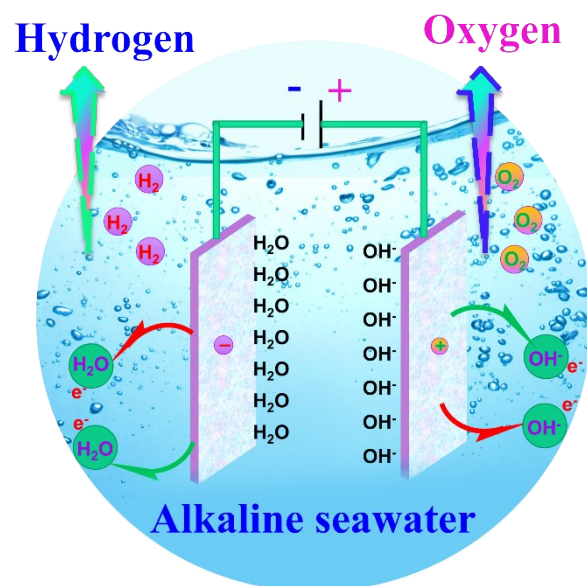

**Fig. S15** A schematic illustration of the electrolyzer using  $Pt-CoP_xBr_{1-x}$  as the cathode and the anode.

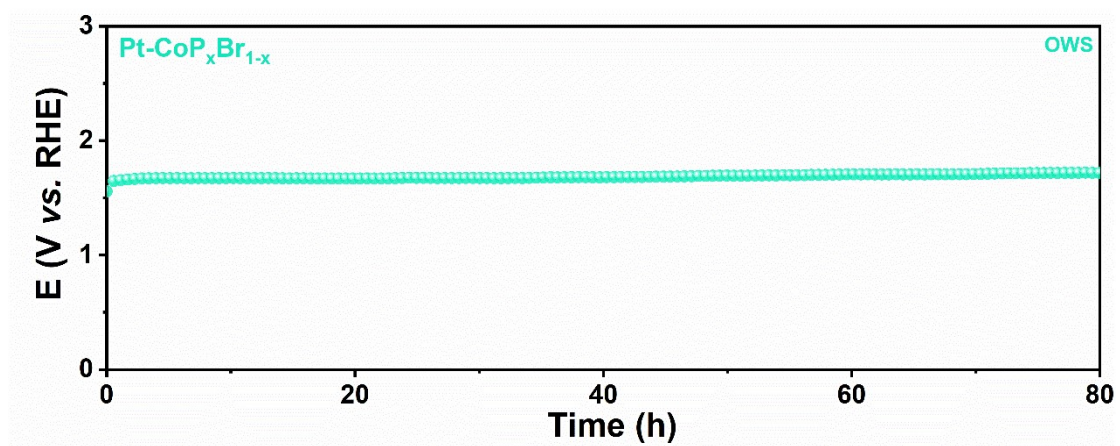

**Fig. S16** Long-term stability plot of Pt-CoP<sub>x</sub>Br<sub>1-x</sub>|| Pt-CoP<sub>x</sub>Br<sub>1-x</sub> at 10 mA cm<sup>-2</sup> in 1 M KOH + seawater.

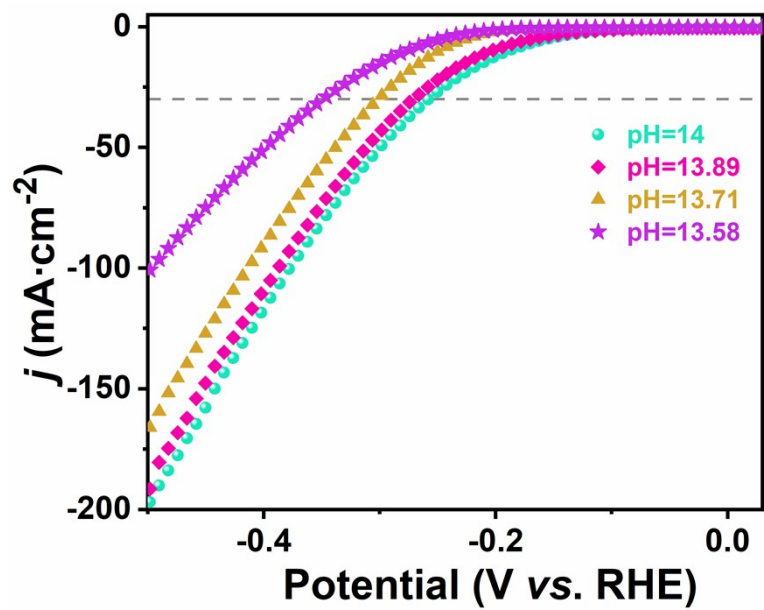

**Fig. S17** HER performance of Pt-CoP in alkaline seawater electrolyte with various pH.

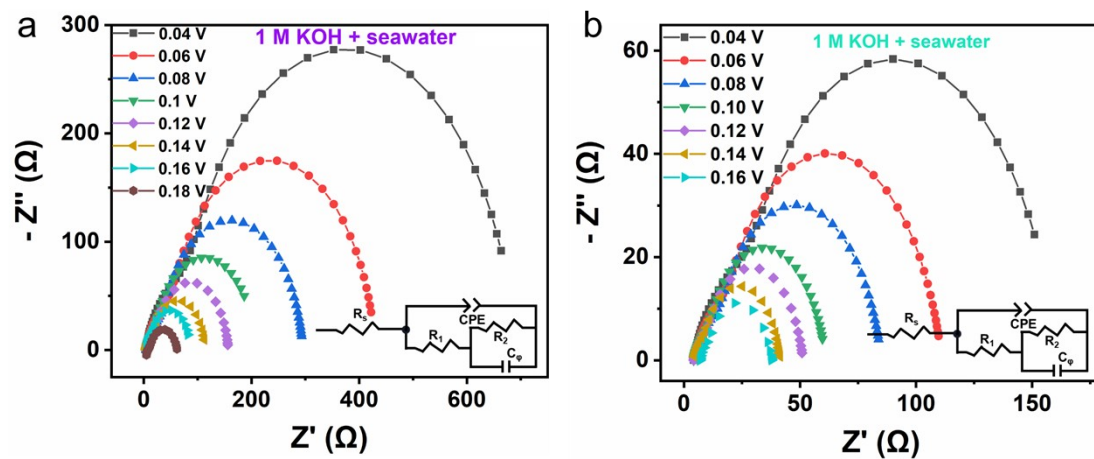

**Fig. S18** (a, b) EIS curves of Pt-CoP and Pt-CoP<sub>x</sub>Br<sub>1-x</sub> for HER in alkaline seawater solution.

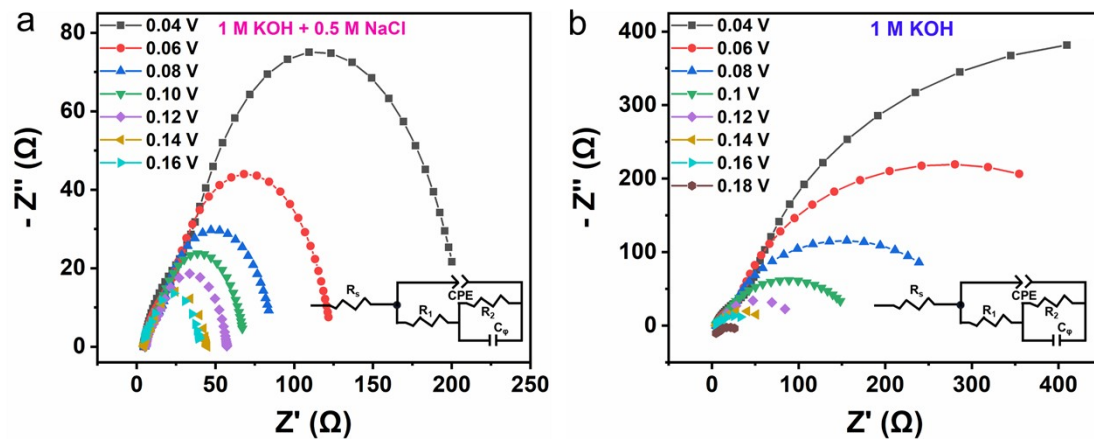

**Fig. S19** (a, b) EIS curves of Pt-CoP<sub>x</sub>Br<sub>1-x</sub> for HER in 1 M KOH and 1 M KOH + 0.5 M NaCl.



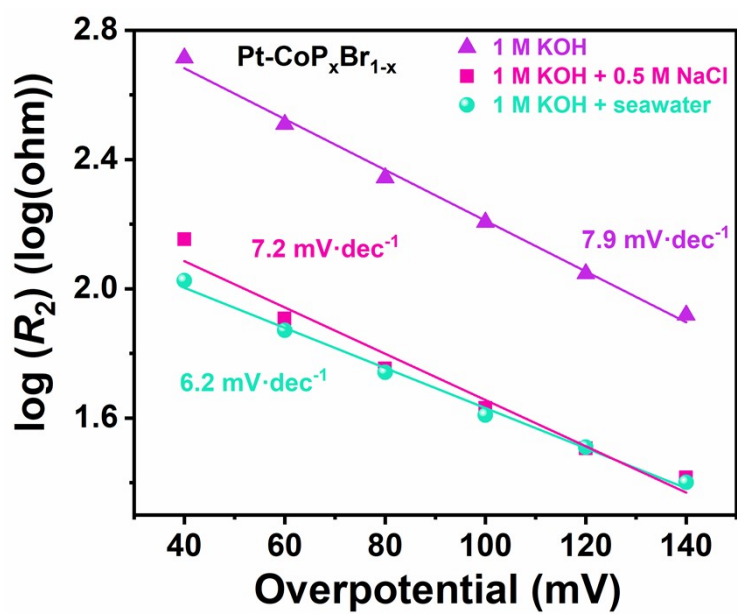

**Fig. S20** EIS-derived Tafel plots of the Pt-CoP<sub>x</sub>Br<sub>1-x</sub> samples attained from the hydrogen adsorption resistance  $R_2$  in various solutions.

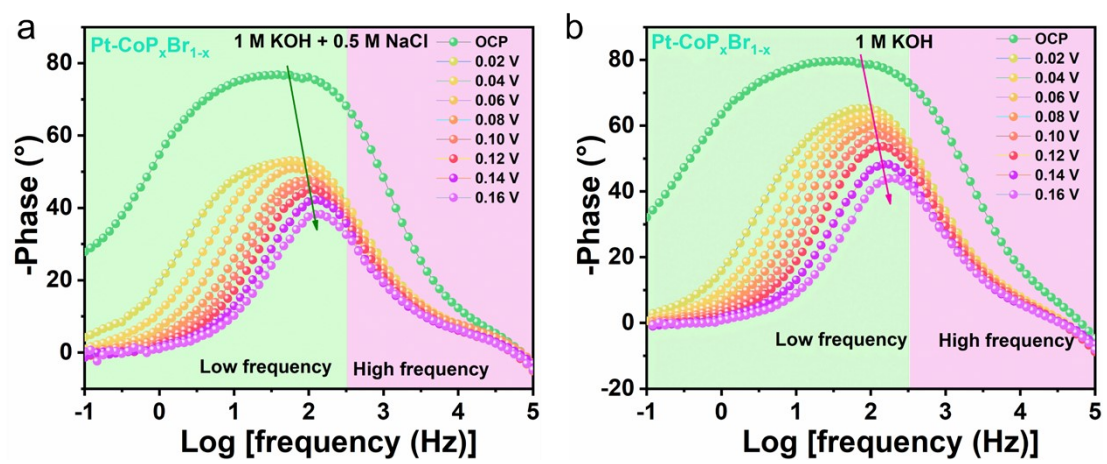

**Fig. S21** (a, b) Phase angles of Pt-CoP<sub>x</sub>Br<sub>1-x</sub> in 1 M KOH + 0.5 M NaCl and 1 M KOH.

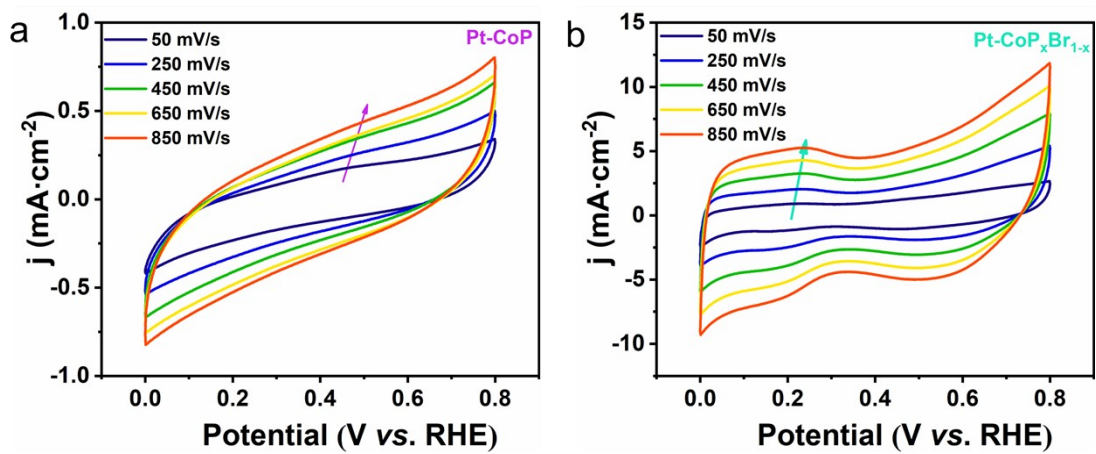

Fig. S22 (a, b) Cyclic voltammetry curves of Pt-CoP and Pt-CoP<sub>x</sub>Br<sub>1-x</sub>.

**Table S2** Comparison of HER performance in alkaline solution using Pt-CoP<sub>x</sub>Br<sub>1-x</sub> and other reported electrocatalysts.

| Catalysts                                                          | Overpotential<br>(mV) | Current density<br>(mA cm <sup>-2</sup> ) | Ref              |
|--------------------------------------------------------------------|-----------------------|-------------------------------------------|------------------|
| <b>Pt-CoP<sub>x</sub>Br<sub>1-x</sub></b>                          | <b>56</b>             | <b>10</b>                                 | <b>This work</b> |
| CoMoSe <sub>2</sub> @Ti <sub>3</sub> C <sub>2</sub> T <sub>x</sub> | 82                    | 10                                        | 1                |
| Fe <sub>2</sub> P/Ni <sub>2</sub> P                                | 108                   | 10                                        | 2                |
| Co-P-O <sub>2</sub>                                                | 113                   | 10                                        | 3                |
| Co-Ni-P/MoS <sub>2</sub>                                           | 116                   | 10                                        | 4                |
| Pd-e-NiCo-PBA-C                                                    | 147                   | 10                                        | 5                |
| NiSe@Co <sub>0.85</sub> Se/NF                                      | 168                   | 10                                        | 6                |
| NiCoSe S/BP                                                        | 172                   | 10                                        | 7                |
| V-MoS <sub>2</sub>                                                 | 206                   | 10                                        | 8                |
| Fe-Co-Ni-P-1                                                       | 215                   | 10                                        | 9                |
| NiFeP/NCH                                                          | 216                   | 10                                        | 10               |
| Co <sub>0.85</sub> Se/Ni <sub>0.85</sub> Se                        | 250                   | 10                                        | 11               |
| FeCo/Co <sub>2</sub> P@NPCF                                        | 260                   | 10                                        | 12               |
| Fe <sub>2</sub> P/Ni <sub>5</sub> P <sub>4</sub>                   | 267                   | 10                                        | 13               |
| Co <sup>II</sup> Fe-ONC                                            | 284                   | 10                                        | 14               |
| SWCNTs/ReS <sub>2</sub>                                            | 327                   | 10                                        | 15               |

**Table S3** Comparison of OER performance in alkaline solution using Pt-CoP<sub>x</sub>Br<sub>1-x</sub> and other reported electrocatalysts.

| Catalysts                                                          | Overpotential<br>(mV) | Current density<br>(mA cm <sup>-2</sup> ) | Ref       |
|--------------------------------------------------------------------|-----------------------|-------------------------------------------|-----------|
| Pt-CoP <sub>x</sub> Br <sub>1-x</sub>                              | 290                   | 10                                        | This work |
| CoP <sub>2</sub> /NC-1                                             | 290                   | 10                                        | 3         |
| Ru <sub>SA</sub> -Co <sub>3</sub> O <sub>4</sub> /CoOOH            | 292                   | 10                                        | 16        |
| Ir@Zr-CoP                                                          | 292                   | 10                                        | 17        |
| CoP@CNF                                                            | 300                   | 10                                        | 18        |
| NiS/Ni <sub>3</sub> S <sub>2</sub> /CeO <sub>2</sub>               | 300                   | 10                                        | 19        |
| NiCo <sub>2</sub> S <sub>4</sub> /HCS-3                            | 310                   | 10                                        | 20        |
| CoP/NiCoP                                                          | 310.7                 | 10                                        | 21        |
| CoP/Mo <sub>2</sub> CT <sub>x</sub>                                | 312                   | 10                                        | 22        |
| CoMoSe <sub>2</sub> @Ti <sub>3</sub> C <sub>2</sub> T <sub>x</sub> | 329                   | 10                                        | 23        |
| Co <sub>1</sub> /TaS <sub>2</sub> -3                               | 330                   | 10                                        | 24        |
| Ru-RuP <sub>x</sub> Co <sub>x</sub> P                              | 338                   | 10                                        | 25        |
| Fe-Co-P                                                            | 340                   | 10                                        | 26        |
| Mn-CoP-2                                                           | 344                   | 10                                        | 27        |
| V-CoP                                                              | 420                   | 10                                        | 28        |

**Table S4** The alkaline OWS performance of Pt-CoP<sub>x</sub>Br<sub>1-x</sub> with some representative bifunctional electrocatalysts reported.

| Catalysts                                 | Electrolyte                        | Cell voltage (V) | Ref              |
|-------------------------------------------|------------------------------------|------------------|------------------|
| <b>Pt-CoP<sub>x</sub>Br<sub>1-x</sub></b> | <b>1.0 KOH+</b><br><b>Seawater</b> | <b>1.62</b>      | <b>This work</b> |
| CoNSC                                     | 1.0 KOH                            | 1.64             | 29               |
| CoP@SNC                                   | 1.0 KOH                            | 1.64             | 30               |
| v- NiS <sub>2</sub> /CeO <sub>2</sub>     | 1.0 KOH                            | 1.64             | 31               |
| NiCo <sub>2</sub> O <sub>4</sub>          | 1.0 KOH                            | 1.65             | 32               |
| Co-NC/C                                   | 1.0 KOH                            | 1.67             | 33               |
| NiFe LDH/NF                               | 1.0 KOH                            | 1.7              | 34               |
| Ni <sub>5</sub> Ni <sub>4</sub> /NF       | 1.0 KOH                            | 1.7              | 35               |
| Ni <sub>3</sub> S <sub>2</sub>            | 1.0 KOH                            | 1.76             | 36               |

**Table S5** The fitted parameters of the EIS data of Pt-CoP<sub>x</sub>Br<sub>1-x</sub> and Pt-CoP for HER in alkaline seawater.

| Catalysis                                 | $\eta$ (mV) | $R_s$ ( $\Omega$ ) | $R_1$ ( $\Omega$ ) | $C_\phi$ (F) |
|-------------------------------------------|-------------|--------------------|--------------------|--------------|
| <b>Pt-CoP<sub>x</sub>Br<sub>1-x</sub></b> | -40         | 4.186              | 106.1              | 0.522        |
|                                           | -60         | 4.358              | 74.49              | 0.588        |
|                                           | -80         | 4.348              | 55.15              | 0.591        |
|                                           | -100        | 4.198              | 40.71              | 0.682        |
|                                           | -120        | 4.243              | 32.36              | 1.28         |
|                                           | -140        | 4.172              | 25.17              | 1.451        |
| <b>Pt-CoP</b>                             | -40         | 4.747              | 517.7              | 0.130        |
|                                           | -60         | 4.746              | 322.8              | 0.130        |
|                                           | -80         | 4.795              | 220.5              | 0.137        |
|                                           | -100        | 4.738              | 160.7              | 0.148        |
|                                           | -120        | 4.764              | 111.4              | 0.158        |
|                                           | -140        | 4.794              | 82.93              | 0.187        |

**Table S6** The fitted parameters of the EIS data of Pt-CoP<sub>x</sub>Br<sub>1-x</sub> for HER in 1 M KOH + 0.5 M NaCl and 1 M KOH.

| Electrolyte                     | $\eta$ (mV) | $R_s$ ( $\Omega$ ) | $R_1$ ( $\Omega$ ) | $C_\phi$ (F) |
|---------------------------------|-------------|--------------------|--------------------|--------------|
| <b>1 M KOH +<br/>0.5 M NaCl</b> | -40         | 4.155              | 142.3              | 0.413        |
|                                 | -60         | 4.425              | 80.84              | 0.438        |
|                                 | -80         | 4.567              | 56.64              | 0.440        |
|                                 | -100        | 4.552              | 42.75              | 0.465        |
|                                 | -120        | 4.577              | 32.05              | 0.516        |
|                                 | -140        | 4.623              | 26.08              | 0.62         |
| <b>1 M KOH</b>                  | -40         | 4.202              | 462.6              | 0.272        |
|                                 | -60         | 4.392              | 243.6              | 0.291        |
|                                 | -80         | 4.5                | 131.9              | 0.407        |
|                                 | -100        | 4.655              | 76.34              | 0.422        |
|                                 | -120        | 4.637              | 45.75              | 0.501        |
|                                 | -140        | 4.667              | 28.25              | 0.605        |

## References

1. J. J. J. J. Kamaraj, A. K. Ravindran, S. P. Muthu and R. Perumalsamy, *J. Power Sources*, 2025, **629**, 235951
2. L. Jin, H. Xu, K. Wang, Y. Liu, X. Qian, H. Chen and G. He, *Chem. Sci.* 2025, **16**, 329-337.
3. Y. Chen, Z. Yang, J. Wang, Y. Yang, X. He, Y. Wang, J. Chen, Y. Guo, X. Wang, S. Wang, *Nano Res.* 2023, **1**.
4. Q. P. Ngo, T. T. Nguyen, Q. T. T. Le, J. H. Lee, N. H. Kim, *Adv. Energy Mater.* 2023, **13**, 2301841.
5. R. Zhang, Z. Wei, G. Ye, G. Chen, J. Miao, X. Zhou, X. Zhu, X. Cao, X. Sun, *Adv. Energy Mater.* 2021, **11**, 2101758.
6. A. Ren, B. Yu, M. Huang, Z. Liu, *I Int. J. Hydrogen Energy.* 2024, **51**, 490.
7. C. Lyu, C. Cao, J. Cheng, Y. Yang, K. Wu, J. Wu, W.-M. Lau, P. Qian, N. Wang, J. Zheng, *Chem. Eng. J.* 2023, **464**, 142538.
8. M. Bi, Y. Zhang, X. Jiang, J. Sun, X. Wang, J. Zhu, Y. Fu, *Adv. Energy Mater.* 2024, **34**, 2309330.
9. J.-B. Chen, J. Ying, Y.-X. Xiao, G. Tian, Y. Dong, L. Shen, S. I. Córdoba de Torresi, M. D. Symes, C. Janiak, X.-Y. Yang, *ACS Catal.* 2023, **13**, 14802.
10. S. Liu, Z. Lin, R. Wan, Y. Liu, Z. Liu, S. Zhang, X. Zhang, Z. Tang, X. Lu, Y. Tian, *J. Mater. Chem. A.* 2021, **9**, 21259.
11. X. Fu, Z. Zhang, Y. Zheng, J. Lu, S. Cheng, J. Su, H. Wei, Y. Gao, *J. Colloid Interf. Sci.* 2024, **653**, 1272.



12. L. Wang, Q. Zhou, Z. Pu, Q. Zhang, X. Mu, H. Jing, S. Liu, C. Chen, S. Mu, *Nano Energy*. 2018, **53**, 270.
13. L. Jin, H. Xu, K. Wang, Y. Liu, X. Qian, G. He and H. Chen, *J. Mater. Chem. A*, 2024, **12**, 32014-32021.
14. Y. Liu, N. Ran, R. Ge, J. Liu, W. Li, Y. Chen, L. Feng, R. Che, *Chem. Eng. J.* 2021, **425**, 131642.
15. K. Liu, C. Zhang, Y. Sun, G. Zhang, X. Shen, F. Zou, H. Zhang, Z. Wu, E. C. Wegener, C. J. Taubert, *ACS Nano*, **2018**, **12**, 158.
16. J. Bao, Y. Zhou, Y. Zhang, X. Sheng, Y. Wang, S. Liang, C. Guo, W. Yang, T. Zhuang, Y. Hu, *J. Mater. Chem. A*. 2020, **8**, 22181.
17. Y.-r. Hao, H. Xue, J. Sun, N. Guo, T. Song, H. Dong, Z. Zhao, J. Zhang, L. Wu and Q. Wang, *Energy Environ. Sci.*, 2024.
18. S. Bolar, S. Shit, J. S. Kumar, N. C. Murmu, R. S. Ganesh, H. Inokawa, T. Kuila,
19. K. Ao, J. Dong, C. Fan, D. Wang, Y. Cai, D. Li, F. Huang, Q. Wei, *ACS sustainable Chem. Eng.* 2018, **6**, 10952.
- Appl. Catal. B: Environ. Energy*, 2019, **254**, 432.
20. D. Xiang, Z. Qin, Y. Gan, X. Luo, X. Li, L. Hu, Y. Xin, X. Lv, M. Hu and S. Jiao, *Mater. Today Chem.*, 2023, **34**, 101791.
21. J. Liu, X. Meng, J. Xie, B. Liu, B. Tang, R. Wang, C. Wang, P. Gu, Y. Song and S. Huo, *Adv. Funct. Mater.*, 2023, **33**, 2300579.
22. Y.-S. Wei, M. Zhang, M. Kitta, Z. Liu, S. Horike, Q. Xu, *J. Am. Chem. Soc.* 2019, **141**, 7906.

23. Q. Shi, Q. Liu, Y. Ma, Z. Fang, Z. Liang, G. Shao, B. Tang, W. Yang, L. Qin, X. Fang, *Adv. Energy Mater.* 2020, **10**, 1903854.
24. Z. Li, Z. Wang, S. Xi, X. Zhao, T. Sun, J. Li, W. Yu, H. Xu, T. S. Heng and X. Hai, *ACS Nano*, 2021, **15**, 7105-7113.
25. B. Martín-García, D. Spirito, S. Bellani, M. Prato, V. Romano, A. Polovitsyn, R. Brescia, R. Oropesa-Nuñez, L. Najafi, A. Ansaldo, *Small*. 2019, **15**, 1904670.
26. P. Guo, Z. Wang, T. Zhang, C. Chen, Y. Chen, H. Liu, M. Hua, S. Wei, X. Lu, *Appl. Catal. B: Environ. Energy*, 2019, **258**, 117968.
27. H. Zhang, Q. Jiang, J. H. Hadden, F. Xie, D. J. Riley, *Adv. Energy Mater.* 2021, **31**, 2008989.
28. X. Zhou, Y. Zi, L. Xu, T. Li, J. Yang, J. Tang, *Inorg. Chem.* 2021, **60**, 11661.
29. Z. Zhang, X. Zhao, S. Xi, L. Zhang, Z. Chen, Z. Zeng, M. Huang, H. Yang, B. Liu, S. J. Pennycook, *Adv. Energy Mater.* **2020**, 10, 2002896.
30. T. Meng, Y.-N. Hao, L. Zheng, M. Cao, *Nanoscale* **2018**, 10, 14613.
31. W. Liao, W. Li, Y. Zhang, *Mater. Today Chem.* **2022**, 24, 100791.
32. X. Gao, H. Zhang, Q. Li, X. Yu, Z. Hong, X. Zhang, C. Liang, Z. Lin, *Angew. Chem. Int. Ed.* **2016**, 55, 6290.
33. H. Huang, S. Zhou, C. Yu, H. Huang, J. Zhao, L. Dai, J. Qiu, *Energy Environ. Sci.* **2020**, 13, 545.
34. J. Luo, J.-H. Im, M. T. Mayer, M. Schreier, M. K. Nazeeruddin, N.-G. Park, S. D. Tilley, H. J. Fan, M. Grätzel, *Sci.* **2014**, 345, 1593.
35. M. Ledendecker, S. Krick Calderón, C. Papp, H. P. Steinrück, M. Antonietti, M.

Shalom, *Angew. Chem. Int. Ed.* **2015**, 54, 12361.

36. L.-L. Feng, G. Yu, Y. Wu, G.-D. Li, H. Li, Y. Sun, T. Asefa, W. Chen, X. Zou, *J. Am. Chem. Soc.* **2015**, 137, 14023.
